# Supplementary material for: Sphingosine-1-phosphate induces islet β-cell proliferation and decreases cell apoptosis in high-fat diet/streptozotocin diabetic mice
Source: PubMed Central journal article supplement — Exp Ther Med. 2019 Sep 11;18(5):3415–24. doi: 10.3892/etm.2019.7999 (PMC6777293; doi:10.3892/etm.2019.7999), 2019-09-11
Supplement: Supplementary_Data.pdf [file Supplementary_Data.pdf]

Figure S1. Immunohistochemical staining of (A) negative controls and (B) positive controls of insulin, Ki-67 and S1PR1-3 in tissue. Magnification, x400; scale bar, 100  $\mu$ m. S1PR, S1P receptor.

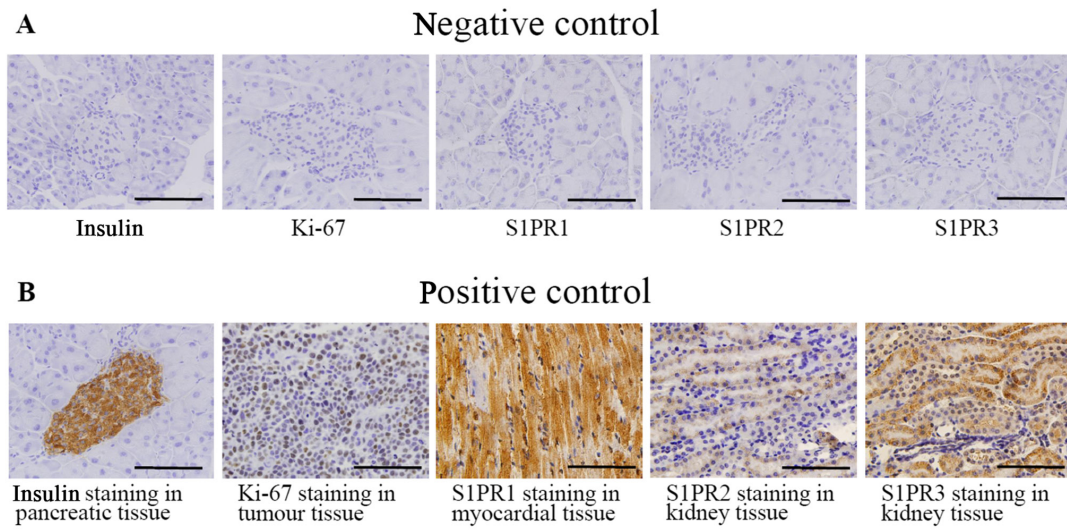

Table SI. Effect of S1P on mouse fasting blood glucose.

| Group | n  | 0 w                     | 1 w                     | 2 w                     | 3 w                     |
|-------|----|-------------------------|-------------------------|-------------------------|-------------------------|
| NC    | 10 | 6.85±1.02               | 7.49±0.52               | 7.45±0.68               | 8.03±0.47               |
| DC    | 8  | 16.11±4.05 <sup>a</sup> | 15.19±4.73 <sup>a</sup> | 16.39±5.22 <sup>a</sup> | 17.26±4.27 <sup>a</sup> |
| S1P   | 9  | 16.03±4.32 <sup>a</sup> | 14.48±5.44 <sup>a</sup> | 14.76±4.90 <sup>a</sup> | 16.01±4.26 <sup>a</sup> |

Values are presented as the mean ± standard deviation. Parametric one-way analysis of variance followed by Least Significant Difference post hoc test was performed for the comparison of the groups. <sup>a</sup>P<0.01 vs. NC. NC, normal control; DC, diabetic control; S1P, sphingosine-1-phosphate.

Table SII. Proliferation rate of islet cells in all groups.

| Group | n  | Proliferation rate (%)      |
|-------|----|-----------------------------|
| NC    | 10 | 0.71 (0.51, 1.02)           |
| DC    | 8  | 0 (0, 0.39) <sup>a</sup>    |
| S1P   | 9  | 0.65 (0, 1.18) <sup>b</sup> |

Values are expressed as the median (interquartiles). Statistical analysis was performed using the Kruskal-Wallis H test. <sup>a</sup>P<0.01 vs. NC; <sup>b</sup>P<0.05 vs. DC. NC, normal control; DC, diabetic control; S1P, sphingosine-1-phosphate.

Table SIII. Apoptosis rate of islet cells in all groups.

| Group | n  | Apoptosis rate (%)        |
|-------|----|---------------------------|
| NC    | 10 | 21.98±2.85                |
| DC    | 8  | 30.43±3.15 <sup>a</sup>   |
| S1P   | 9  | 27.52±2.23 <sup>a,b</sup> |

Values are expressed as the mean ± standard deviation. Parametric one-way analysis of variance followed by Least Significant Difference post hoc test was performed for comparison of the groups. <sup>a</sup>P<0.01 vs. NC; <sup>b</sup>P<0.05 vs. DC. NC, normal control; DC, diabetic control; S1P, sphingosine-1-phosphate.

Table SIV. IOD/area of S1PR1, S1PR2 and S1PR3 in all groups.

| Group | n  | IOD/area of S1PR1          | IOD/area of S1PR2          | IOD/area of S1PR3 |
|-------|----|----------------------------|----------------------------|-------------------|
| NC    | 10 | 0.0914±0.0139              | 0.0356±0.0147              | 0.0813±0.0250     |
| DC    | 8  | 0.1296±0.0181 <sup>b</sup> | 0.0499±0.0130 <sup>a</sup> | 0.0779±0.0234     |
| S1P   | 9  | 0.1308±0.0108 <sup>b</sup> | 0.0495±0.0133 <sup>a</sup> | 0.0943±0.0178     |

Values are expressed as the mean ± standard deviation. Parametric one-way analysis of variance followed by Least Significant Difference post hoc test was performed for the comparison of the groups. <sup>a</sup>P<0.05 and <sup>b</sup>P<0.01 vs. NC. NC, normal control; DC, diabetic control; S1P, sphingosine-1-phosphate; S1PR, S1P receptor; IOD, integrated optical density.
